# Supplementary material for: Evolution of Blind Beetles in Isolated Aquifers: A Test of Alternative Modes of Speciation
Source: PLoS One. 2012 Mar 30;7(3):e34260. doi: 10.1371/journal.pone.0034260 (PMC3316697; doi:10.1371/journal.pone.0034260)
Supplement: Supporting Information S1 — List of examined taxa with details on sample localities, and GenBank accession numbers. (XLS) [file pone.0034260.s001.xls]

## Sheet: start here
	niche colonisation chance					ancsp1	ancsp2						no. ancestral	% allo pairs				% symp pairs	min ancestral
	input:	0.5	0.601247	0	1	#DIV/0!	4	#DIV/0!	#DIV/0!			0	6	13.3333	2	0		20	6
			0.912562	0	1	#DIV/0!	2	#DIV/0!	#DIV/0!				6					% symp triplets	6
		Read this first !	0.368067	1	0	2	#DIV/0!	#DIV/0!	#DIV/0!	#DIV/0!		0	6		0	0		11.1111	6
			0.0377565	1	0	5	#DIV/0!	#DIV/0!	#DIV/0!	#DIV/0!			6						6
			0.392703	1	0	0	#DIV/0!	#DIV/0!	#DIV/0!	#DIV/0!			6						6
			0.112379	1	0	0	#DIV/0!					0	10		0	0			10
			0.523371	0	1	#DIV/0!	9					0	10		0	0			10
			0.295689	1	0	1	#DIV/0!					0	10		0	0			10
			0.876218	0	1	#DIV/0!	0					0	10		0	0			10
			0.670054	0	1	#DIV/0!	0					0	10		0	0			10
			0.306666	1	0	9	#DIV/0!					0	10		0	0			10
			0.955755	0	1	#DIV/0!	1					0	10		0	0			10
			0.000381394	1	0	1	#DIV/0!					0	10		0	0			10
			0.198961	1	0	7	#DIV/0!					0	10		0	0			10
			0.986595	0	1	#DIV/0!	3					0	10		0	0			10
			0.443742	1	0	7	#DIV/0!					0	10		0	0			10
			0.0718209	1	0	0	#DIV/0!					0	10		0	0			10
			0.690705	0	1	#DIV/0!	5					0	10		0	0			10
			0.481409	1	0	5	#DIV/0!					0	10		0	0			10
			0.233702	1	0	8	#DIV/0!					0	10		0	0			10
			0.0203172	1	0	1	#DIV/0!					0	10		0	0			10
			0.608936	0	1	#DIV/0!	3					0	10		0	0			10
			0.346276	1	0	5	#DIV/0!					0	10		0	0			10
			0.919033	0	1	#DIV/0!	4	#DIV/0!	#DIV/0!			0	6		2	0			6
			0.84471	0	1	#DIV/0!	3	#DIV/0!	#DIV/0!				6						6
			0.167814	1	0	2	#DIV/0!	#DIV/0!	#DIV/0!			0	6		1	1			6
			0.909613	0	1	#DIV/0!	1	#DIV/0!	-1				6						6
			0.15771	1	0	5	#DIV/0!	#DIV/0!	#DIV/0!			0	6		1	1			6
			0.564449	0	1	#DIV/0!	4	#DIV/0!	-1				6						6
			0.764411	0	1	#DIV/0!	2	#DIV/0!	2			0	6		1	1			6
			0.0810047	1	0	0	#DIV/0!	#DIV/0!	#DIV/0!				6						6
			0.393745	1	0	0	#DIV/0!	#DIV/0!	#DIV/0!			0	6		1	1			6
			0.671063	0	1	#DIV/0!	4	#DIV/0!	4				6						6
			0.244332	1	0	1	#DIV/0!	#DIV/0!	#DIV/0!			0	6		1	1			6
			0.881147	0	1	#DIV/0!	2	#DIV/0!	1				6						6
			0.597573	0	1	#DIV/0!	3	#DIV/0!	#DIV/0!			0	6		2	0			6
			0.795148	0	1	#DIV/0!	1	#DIV/0!	#DIV/0!				6						6
			0.52222	0	1	#DIV/0!	2	#DIV/0!	#DIV/0!			0	6		2	0			6
			0.701563	0	1	#DIV/0!	5	#DIV/0!	#DIV/0!				6						6
			0.0739441	1	0	1	#DIV/0!	#DIV/0!	#DIV/0!			1	6		1	1			6
			0.985738	0	1	#DIV/0!	1	#DIV/0!	0				6						6
			0.684431	0	1	#DIV/0!	3	#DIV/0!	#DIV/0!			0	6		2	0			6
			0.648108	0	1	#DIV/0!	5	#DIV/0!	#DIV/0!				6						6
			0.110817	1	0	3	#DIV/0!	#DIV/0!	#DIV/0!			0	6		0	0			6
			0.128643	1	0	0	#DIV/0!	#DIV/0!	#DIV/0!				6						6
			0.925747	0	1	#DIV/0!	4	#DIV/0!	0			1	6		1	1			6
			0.0854473	1	0	4	#DIV/0!	#DIV/0!	#DIV/0!				6						6
			0.705289	0	1	#DIV/0!	0	#DIV/0!	-3			0	7		1	1			7
			0.192777	1	0	3	#DIV/0!	#DIV/0!	#DIV/0!				7						7
			0.575122	0	1	#DIV/0!	1	#DIV/0!	#DIV/0!			0	7		2	0			7
			0.533054	0	1	#DIV/0!	0	#DIV/0!	#DIV/0!				7						7
			0.758543	0	1	#DIV/0!	1	#DIV/0!	#DIV/0!			0	7		2	0			7
			0.742611	0	1	#DIV/0!	3	#DIV/0!	#DIV/0!				7						7
			0.271023	1	0	3	#DIV/0!	#DIV/0!	#DIV/0!	#DIV/0!		1	6		2	2			6
			0.643751	0	1	#DIV/0!	3	#DIV/0!	0	#DIV/0!			6						6
			0.684894	0	1	#DIV/0!	1	#DIV/0!	#DIV/0!	-2			6						6
			0.80131	0	1	#DIV/0!	2	#DIV/0!	2	#DIV/0!		0	6		2	2			6
			0.0840728	1	0	0	#DIV/0!	#DIV/0!	#DIV/0!	#DIV/0!			6						6
			0.758908	0	1	#DIV/0!	4	#DIV/0!	4	#DIV/0!			6						6
			0.290458	1	0	0	#DIV/0!	#DIV/0!	#DIV/0!	#DIV/0!		0	6		0	0			6
			0.250336	1	0	4	#DIV/0!	#DIV/0!	#DIV/0!	#DIV/0!			6						6
			0.148967	1	0	3	#DIV/0!	#DIV/0!	#DIV/0!	#DIV/0!			6						6
			0.118234	1	0	0	#DIV/0!	#DIV/0!	#DIV/0!	#DIV/0!		1	6		2	2			6
			0.872241	0	1	#DIV/0!	3	#DIV/0!	3	#DIV/0!			6						6
			0.604299	0	1	#DIV/0!	0	#DIV/0!	#DIV/0!	0			6						6
			0.984887	0	1	#DIV/0!	2	#DIV/0!	2	0		1	6		1	1			6
			0.446272	1	0	0	#DIV/0!	#DIV/0!	#DIV/0!	#DIV/0!			6						6
			0.23928	1	0	2	#DIV/0!	#DIV/0!	#DIV/0!	#DIV/0!			6						6
			0.0980977	1	0	3	#DIV/0!	#DIV/0!	#DIV/0!	#DIV/0!		1	6		2	2			6
			0.900423	0	1	#DIV/0!	4	#DIV/0!	1	#DIV/0!			6						6
			0.827027	0	1	#DIV/0!	3	#DIV/0!	#DIV/0!	0			6						6
			0.219414	1	0	1	#DIV/0!	#DIV/0!	#DIV/0!	#DIV/0!		0	6		0	0			6
			0.0364608	1	0	1	#DIV/0!	#DIV/0!	#DIV/0!	#DIV/0!			6						6
			0.479096	1	0	0	#DIV/0!	#DIV/0!	#DIV/0!	#DIV/0!			6						6
			0.223301	1	0	0	#DIV/0!	#DIV/0!	#DIV/0!	#DIV/0!		0	7		2	2			7
			0.934921	0	1	#DIV/0!	2	#DIV/0!	2	#DIV/0!			7						7
			0.636548	0	1	#DIV/0!	1	#DIV/0!	#DIV/0!	1			7						7
			0.30875	1	0	1	#DIV/0!	#DIV/0!	#DIV/0!	#DIV/0!		0	7		0	0			7
			0.171271	1	0	3	#DIV/0!	#DIV/0!	#DIV/0!	#DIV/0!			7						7
			0.0228207	1	0	4	#DIV/0!	#DIV/0!	#DIV/0!	#DIV/0!			7						7
			0.498686	1	0	1	#DIV/0!	#DIV/0!	#DIV/0!	#DIV/0!		0	8		0	0			8
			0.287937	1	0	6	#DIV/0!	#DIV/0!	#DIV/0!	#DIV/0!			8						8
			0.235121	1	0	3	#DIV/0!	#DIV/0!	#DIV/0!	#DIV/0!			8						8
	4 niches example		0.919093	0	1	#DIV/0!	0	#DIV/0!	#DIV/0!	0	0	4			2	2
			0.976295	0	1	#DIV/0!	0	#DIV/0!	#DIV/0!	0	0
			0.189494	1	0	0	#DIV/0!	#DIV/0!	#DIV/0!	#DIV/0!	#DIV/0!
			0.00927724	1	0	0	#DIV/0!	#DIV/0!	#DIV/0!	#DIV/0!	#DIV/0!
	3 niches 3 colonisations example
			0	1	0	#DIV/0!	8	#DIV/0!	#DIV/0!	#DIV/0!	-5	1	10
			0	1	0	#DIV/0!	3	#DIV/0!	#DIV/0!	#DIV/0!	0
			1	0	0	3	#DIV/0!	#DIV/0!	#DIV/0!	#DIV/0!	#DIV/0!
									#DIV/0!	#DIV/0!	#DIV/0!
									#DIV/0!	#DIV/0!	#DIV/0!
									#DIV/0!	#DIV/0!	#DIV/0!
									#DIV/0!	#DIV/0!	#DIV/0!
									#DIV/0!	#DIV/0!	#DIV/0!
									#DIV/0!	#DIV/0!	#DIV/0!
	niche colonisation chance variable
	chance >		0.809434	0	1	#DIV/0!	1	#DIV/0!	#DIV/0!	#DIV/0!		0	10		3
	0.5		0.775672	0	1	#DIV/0!	0	#DIV/0!	#DIV/0!	#DIV/0!
			0.925243	0	1	#DIV/0!	5	#DIV/0!	#DIV/0!	#DIV/0!
			0.141974	1	0	6	#DIV/0!	#DIV/0!	#DIV/0!			0	10		1
			0.958436	0	1	#DIV/0!	1	#DIV/0!	-5

## Sheet: results
Allo pairs	Symp pairs	Symp triplets	Symp tot		Allo pairs	Symp pairs	Symp triplets	Symp tot		Allo pairs	Symp pairs	Symp triplets	Symp tot
#DIV/0!	#DIV/0!	#DIV/0!	#DIV/0!		#DIV/0!	#DIV/0!	#DIV/0!	#DIV/0!		#DIV/0!	#DIV/0!	#DIV/0!	#DIV/0!	24.44
#DIV/0!	#DIV/0!	#DIV/0!	#DIV/0!		#DIV/0!	#DIV/0!	#DIV/0!	#DIV/0!		#DIV/0!	#DIV/0!	#DIV/0!	#DIV/0!
0.5 col chance ,mixed no. ancestors					0.78 col chance, 10 ancestors					0.5 col chance ,10 ancestors
Use T-tests two sample assuming equal variances to calculate difference between observed (24.44) % of sister species and expected using randomization.

## Sheet: Taxon list+GenBank
aquifer	locality	dec.lat	dec.long	genus	species	number squenced	ABTC	CO1	16S-tRNA-ND1				S	E
				subterranean species from the Yilgarn, Western Australia (all described by Watts & Hymphreys)
1	Bunnawarra Stn	-28.6096	116.574	Limbodessus	micrommatoion	2	78662-3	JQ745755	JQ745723
1	Bunnawarra Stn	-28.6096	116.574	Limbodessus	microocula	3	78656-7,78769	JQ745756-7	JQ745724-5
2	Three Rivers	-25.2831	119.176	Paroster	plutonicensis	16	78578,80,78632-47	AY350892	AY353839
2	Three Rivers	-25.2831	119.176	Bidessodes	gutteridgei	2	78577,79	AY350894	AY353841
2	Three Rivers	-25.2831	119.176	Bidessodes	limestonensis	1	78581	AY350880	AY353827
3	Milgun	-25.1228	118.096	Paroster	hamoni	1	78583	AY350878	AY353825
3	Milgun	-25.1228	118.096	Paroster	milgunensis	1	78582	AY350879	AY353826
4	Mt Augustus Stn Isobel Well	-24.3861	117.019	Paroster	tetrameres	2	78764-5	EU616985	EU616930
5	Windimurra	-28.2861	118.574	Limbodessus	trispinosus	3	78555	AY350889	AY353836
6	Challa Stn North Main Road Bore	-27.9969	118.523	Limbodessus	surreptitius	3	78556-8	AY350903	AY353850
6	Challa	-27.9884	118.518	Limbodessus	challaensis	1	75367	AF484142	AF485947
6	Challa	-27.9884	118.518	Limbodessus	nyungduo	3	78556-8	AY350903	AY353850
7	Austin Downs	-27.4134	117.711	Limbodessus	bigbellensis	5	78560-1,593,684,698	AY350902	AY353849
7	Austin Downs	-27.4134	117.711	Limbodessus	cf. cueensis	10	78559,62,78614-621	AY350888	AY353835
8	Nannine	-27.2697	117.99	Limbodessus	cueensis	6	75368-9,78622-5	AF484143	AF485948
8	Nannine	-27.2697	117.99	Limbodessus	magnificus	3	75383-4	AF484149	AF485954
9	Karalundi	-26.0795	118.412	Limbodessus	karalundiensis	2	78549-50	AY350891	AY353838
9	Karalundi	-26.0795	118.412	Paroster	skaphites	5	78669-70,78694-6	EU616970	EU616915
9	Karalundi	-26.0795	118.412	Paroster	stegastos	4	78671,91,78701-2	EU616969	EU616914
10	Killara	-26.3518	118.989	Limbodessus	killaraensis	2	78770-1	EU616992	EU616937
11	Hillview	-26.9721	118.8	Limbodessus	hillviewensis	1	78983	JQ745758	JQ745726
12	Belele	-26.4703	118.103	Paroster	cf. skaphites	1	78757	EU616968	EU616931
12	Belele	-26.4703	118.103	Paroster	sp. Belele R407	1	79980	EU617014
13	Moorarie	-25.9662	117.591	Limbodessus	wogarthaensis	2	78679-80	JQ745759	JQ745727
13	Moorarie	-25.9662	117.591	Paroster	eurypleuron	2	78681,78766	EU616964	EU616909
13	Moorarie	-25.9662	117.591	Paroster	verucosus	1	78682	EU616963	EU616908
14	Byro	-25.9107	115.884	Paroster	arachnoides	2	78660-1	EU616972	EU616917
14	Byro	-25.9107	115.884	Paroster	byroensis	2	78677-8	EU616965	EU616910
14	Byro Dingbat Well	-25.8755	115.895	Paroster	dingbatensis	2	78675-6	EU616966	EU616911
15	Innouendy	-25.814	116.428	Paroster	copidotibiae	2	78674,78761	EU616967	EU616912
15	Innouendy	-25.814	116.428	Paroster	innouendiensis	2	78672-3	EU616968	EU616913
16	Moorarie Bin Bin	-25.871	117.451	Paroster	bulbus	2	78658-9	EU616973	EU616918
17	Padbury	-25.6932	118.088	Limbodessus	padburyensis	2	78666-7	JQ745760	JQ745728
18	Mt Narryer Stn	-26.5924	115.926	Limbodessus	narryerensis	2	78757-8	JQ745761	JQ745729
19	Windarra Stn, South Well	-28.4662	122.157	Limbodessus	palmulaoides	1	78934	JQ745762	JQ745730
19	Windarra Stn, South Well	-28.4662	122.157	Limbodessus	lapostae	2	78853-4	JQ745763	JQ745731
19	Windarra Stn, South Well	-28.4782	122.137	Limbodessus	windarraensis	2	75378-9	AF484148	AF485953
20	Paroo	-26.4339	119.777	Limbodessus	eberhardi	2	75381-2	AF484152	AF485957
20	Paroo	-26.4339	119.777	Kintinga	kurutjutu	2	78893-4	AF484151	AF485956
20	Paroo	-26.4339	119.777	Limbodessus	pulpa	2	75376-7	JQ745764	JQ745732
21	Hinkler Stn Dawsons Well	-26.8865	120.162	Limbodessus	hinkleri	3	75371-3	AF484146	AF485951
21	Hinkler Stn Dawsons Well	-26.8865	120.162	Limbodessus	macrohinkleri	1	78877	JQ745765	JQ745733
21	Hinkler Stn Dawsons Well	-26.8865	120.162	Limbodessus	raeae	3	78879,81-82	JQ745766	JQ745734
22	Melrose	-27.3913	121.337	Paroster	darlotensis	2	78703-4	EU616976	EU616921
22	Melrose	-27.3913	121.337	Paroster	melrosensis	2	78705-6	EU616977	EU616922
23	Jundee	-26.2827	120.677	Limbodessus	jundeeensis	2	78563-4	AY350887	AY353834
24	Cunyu	-25.7873	120.107	Limbodessus	bialveus	2	78573-4	AY350904	AY353851
24	Cunyu	-25.7873	120.107	Limbodessus	macrotarsus	3	78575-6,78605	AY350881	AY353828
25	Cunyu, Sweetwater Well	-25.5938	120.372	Limbodessus	silus	2	78568-9	AY350883	AY353830
25	Cunyu, Sweetwater Well	-25.5938	120.372	Limbodessus	cunyensis	1	78572	AY350893	AY353840
25	Cunyu, Sweetwater Well	-25.5938	120.372	Limbodessus	sweetwatersensis	2	78750-1	AY350882	AY353829
26	Yuinmery	-28.5486	119.091	Limbodessus	yuinmeryensis	2	78552-3	AY350890	AY353837
26	Yuinmery	-28.5486	119.091	Paroster	cf. hinzeae	1	78551	AY350885	AY353832
27	Pinnacles	-28.2574	120.127	Limbodessus	pinnaclesensis	2	78612-3	AY350899	AY353846
27	Pinnacles	-28.2574	120.127	Paroster	fortisspina	2	78610-1	AY350900	AY353847
27	Pinnacles	-28.2574	120.127	Paroster	sp. 8	1	78554	AY350884	AY353831
28	Depot Springs	-28.0601	120.067	Limbodessus	fridaywellensis	1	75370	AF484145	AF485950
28	Depot Springs	-28.0601	120.067	Paroster	hinzeae	1	75380	AF484135	AF485940
29	Lake Mason	-27.54	119.624	Limbodessus	masonensis	1	75374-5	AF484147	AF485952
29	Lake Mason	-27.54	119.624	Limbodessus	raesidensis	1	75385	AF484153	AF485958
30	Barwidgee St.	-27.1376	120.946	Limbodessus	barwidgeeensis	1	78863	JQ745767	JQ745735
30	Barwidgee St.	-27.1375	120.949	Limbodessus	usitatus	2	78864-5	JQ745768	JQ745736
31	Mt Weld St, Mt Morgan	-28.7327	122.154	Limbodessus	cooperi	2	78932-3	JQ745769	JQ745737
31	Mt Weld St, Mt Morgan	-28.7327	122.154	Limbodessus	leysi	2	78936-7	JQ745770	JQ745738
32	Maranalgo St	-29.3486	117.806	Limbodessus	exilis	3	78869,86-7	JQ745771
33	Perrinvale stn Gum Well	-28.775	120.417	Limbodessus	gumwellensis	2	78840-1	JQ745772	JQ745739
34	Carnegie Stn Jimmys Well	-25.6606	122.869	Limbodessus	harleyi	2	78867-8	JQ745773	JQ745740
35	Melita Stn Suns of Gwalia	-28.9343	121.306	Limbodessus	melitaensis	2	78907-8	JQ745774	JQ745741
35	Melita Stn Suns of Gwalia	-28.9343	121.306	Limbodessus	micromelitaensis	2	78899-900	JQ745775	JQ745742
36	Millbillie Stn Bubble Well	-26.5608	120.041	Limbodessus	millbilliensis	2	78909-10	JQ745776	JQ745743
37	Yakabindie Stn	-27.7466	120.524	Limbodessus	mirandaea	2	78874,6	JQ745777	JQ745744
38	Nambi Stn	-28.2397	121.836	Limbodessus	nambiaensis	2	78857-8	JQ745778	JQ745745
39	Yakabindie Stn, Lake Miranda East	-27.6641	120.612	Limbodessus	phoebeae	6	78871-3,5,78921-2	JQ745779
40	Yandal Stn	-27.7249	120.958	Limbodessus	yandalensis	3	78859,60-1	JQ745780	JQ745746
41	Sturt Meadows	-28.7164	120.89	Paroster	macrosturtensis	2	78843-4	EU616995	EU616940
41	Sturt Meadows	-28.7164	120.89	Paroster	mesosturtensis	2	78845-6	EU616997	EU616942
41	Sturt Meadows	-28.7164	120.89	Paroster	microsturtensis	3	78847-8,50	EU616996	EU616941
42	Lorna Glen Stn	-26.2586	121.404	Limbodessus	lornaensis	2	78903-4	JQ745781	JQ745747
42	Lorna Glen Stn	-26.2586	121.404	Limbodessus	macrolornaensis	2	78901-2	JQ745782	JQ745748
43	Murrum	-28.2769	117.324	Limbodessus	murrumensis	2	78978-9	JQ745783	JQ745749
44	Yarrabubba	-27.0668	118.678	Limbodessus	yarrabubbaensis	2	78982-3	JQ745784	JQ745750
44	Yarrabubba	-27.0668	118.678	Limbodessus	microbubba	2	78984-5	JQ745785	JQ745751
45	Uramurdah Lake	-26.6876	120.353	Limbodessus	morgani	1	78885	JQ745786	JQ745752
45	Uramurdah Lake	-26.6876	120.353	Limbodessus	hahni	2	78883-4	JQ745787	JQ745753
				subterranean species from other parts of Australia (described by Watts & Hymphreys unless otherwise stated)
	Willow Springs, SA	-31.4490	138.7603	Paroster	extraordinarius Leys et all.	1		GQ380574	GQ380572
	Woolomin Store, NSW	-31.18.17	151.08.06	Paroster	peelensis	1	79000-1	EU371111	EU371112
	Newhaven Stn, NT	-22.728	131.166	Paroster	Newhaven R401	1	78974	JQ745788	JQ745754
	Newhaven Yelabra Well, NT	-22.898	131.575	Paroster	readi	2	78931,74	EU617013	EU616958
	Mt Wedge, NT	-22.773	132.114	Paroster	spnMtWedgeR357	1	78930	EU617009	EU616954
	Newhaven Stn, NT	-22.9344	131.24	Paroster	megamacrocephalus	1	78781	EU616990	EU616935
	Newhaven Stn, NT	-22.728	131.166	Paroster	newhavenensis	2	78590-1	EU616962	EU616907
	Mt Wedge, NT	-22.773	132.114	Paroster	wedgeensis	4	78773-4,78787-8	EU616993	EU616938
	Napperby Stn, NT	-22.909	132.73	Paroster	napperbyensis	1	78592	EU616961	EU616906
	Napperby Stn, NT	-22.909	132.73	Paroster	macrocephalus	1	78566	EU616960	EU616905
	Newhaven Camel Well, NT	-22.9344	131.24	Paroster	pentameres	2	78777-8	EU616991	EU616936
				Surface species
				Allodessus	bistrigatus (Clark)	3	70192-4	AF484126	AF485931
				Bidessodes	biliti Watts	1	9601	AF484127	AF485932
				Bidessodes	mjoberg (Zimmerman)	1	9411	AF484128	AF485933
				Limbodessus	rivulus (Larson)	1	9451	AF484129	AF485934
				Limbodessus	occidentalis (Watts)	3	75354-5	AF484150	AF485955
				Clypeodytes	migrator (Sharp)	1	9460	AF484130	AF485935
				Gibbidessus	chipi Watts	1	75358	AF484132	AF485937
				Hydroglyphus	balkei Hendrick	1	9413	AF484133	AF485938
				Hydroglyphus	deameli (Sharp)	1	9298	AF484134	AF485939
				Limbodessus	compactus (Clark)	3	75359-61	AF484155	AF485960
				Limbodessus	amablis (Clark)	1	9230	AF484136	AF485941
				Limbodessus	dispar (Sharp)	1	9576	AF484137	AF485942
				Limbodessus	inornatus (Sharp)	2	95439564	AF484138	AF485943
				Limbodessus	gemellus (Clark)	1	78655	AY350901	AY353848
				Limbodessus	praelargus (Lea)	1	9705	AF484139	AF485944
				Limbodessus	shuckhardi (Clark)	1	75362	AF484156	AF485961
				Paroster	gibbi Watts	2	78588-9	AY350895	AY353842
				Paroster	niger Watts	2	78650-1	EU616989	EU616934
				Paroster	nigroadumbratus (Clark)	2	78584-5	AY350877	AY353824
				Paroster	couragei Watts	2	78942-3	EU616975	EU616920
				Paroster	michaelseni Regimbart	2	78965-6	EU616974	EU616919
				Uvarus	pictipes (Lea)	1	75386	AF484154	AF485959
